# Supplementary material
Source: Research Square preprint supplement (doi:10.21203/rs.3.rs-8330219/v1)
Supplement: Supplementary file 1 [file ec1d041e085c48fc4acb552a.docx]

**Woody plant assemblages in restoration sites and remnants of Seasonal Atlantic Forest in Southern Brazil**

Jéssica Oliveira Araújo1, Géssi de Souza Gonzaga1, Juliana Deganello Vieira2, Alba Lúcia Cavalheiro1 and José Marcelo Domingues Torezan1*

1-Labre - Biodiversity and Ecosystem Restoration Lab

Londrina State University

Campus Universitário - CCB - BAV

86.057-970 Londrina PR Brazil

2-Instituto Federal do Paraná – Campus Jacarezinho

Avenida Dr. Tito 801 – Jardim Panorama

86.400-000 – Jacarezinho PR Brazil

*Corresponding author torezan@uel.br

**Supplementary material**

Tables S1 and S2 in the following pages.

**Table S1 –** Species sampled in six forest fragments of semi-deciduous seasonal forest in the northern part of the state of Paraná. ALV = Alvorada farm; BUL = Bule farm; CGH = Congonhas farm; SAN = Santo Antônio farm; IBI = Ibicatu State Park; PMG = Mata dos Godoy State Park.

| **Species name** | **Family** | **ALV** | **BUL** | **CGH** | **SAN** | **IBI** | **PMG** |
| --- | --- | --- | --- | --- | --- | --- | --- |
| Actinostemon concolor (Spreng.) Müll.Arg. | Euphorbiaceae | 27 | 15 | 26 | 29 | 74 | 49 |
| Aegiphila integrifolia (Jacq.) Moldenke. | Lamiaceae | 1 | 1 | 3 | 0 | 0 | 0 |
| Aiouea montana (Sw.) R.Rohde | Lauraceae | 0 | 0 | 0 | 0 | 0 | 1 |
| Alchornea glandulosa Poepp. & Endl. | Euphorbiaceae | 0 | 2 | 0 | 4 | 0 | 3 |
| Alchornea triplinervia (Spreng.) Müll.Arg. | Euphorbiaceae | 0 | 0 | 0 | 1 | 0 | 4 |
| Allophylus edulis (A.St.-Hil. et al.) Hieron. ex Niederl. | Sapindaceae | 3 | 0 | 0 | 0 | 4 | 0 |
| Alseis floribunda Schott | Rubiaceae | 0 | 0 | 2 | 2 | 0 | 0 |
| Annona cacans Warm. | Annonaceae | 0 | 0 | 0 | 1 | 0 | 0 |
| Annona sylvatica A.St.-Hil. | Annonaceae | 1 | 2 | 3 | 4 | 3 | 2 |
| Aspidosperma polyneuron Müll.Arg. | Apocynaceae | 20 | 17 | 8 | 15 | 11 | 17 |
| Astronium graveolens Jacq. | Anacardiaceae | 38 | 3 | 11 | 12 | 15 | 3 |
| Attalea dubia (Mart.) Burret | Arecaceae | 0 | 0 | 14 | 0 | 0 | 0 |
| Balfourodendron riedelianum (Engl.) Engl. | Rutaceae | 9 | 0 | 7 | 14 | 1 | 1 |
| Bauhinia forficata Link | Fabaceae | 0 | 0 | 0 | 1 | 0 | 0 |
| Bauhinia longifolia (Bong.) Steud. | Fabaceae | 0 | 0 | 1 | 0 | 0 | 0 |
| Bougainvillea spectabilis Willd. | Nyctaginaceae | 3 | 1 | 2 | 0 | 3 | 2 |
| Cabralea canjerana (Vell.) Mart. | Meliaceae | 0 | 13 | 0 | 0 | 0 | 16 |
| Campomanesia guaviroba (DC.) Kiaersk. | Myrtaceae | 2 | 0 | 0 | 0 | 2 | 2 |
| Campomanesia guazumifolia (Cambess.) O.Berg | Myrtaceae | 0 | 0 | 0 | 1 | 0 | 0 |
| Campomanesia xanthocarpa (Mart.) O.Berg | Myrtaceae | 3 | 2 | 2 | 2 | 4 | 1 |
| Cariniana estrellensis (Raddi) Kuntze | Lecythidaceae | 0 | 0 | 2 | 0 | 0 | 1 |
| Casearia decandra Jacq. | Salicaceae | 0 | 2 | 0 | 0 | 0 | 0 |
| Casearia gossypiosperma Briq. | Salicaceae | 3 | 3 | 4 | 1 | 8 | 0 |
| Casearia sylvestris Sw. | Salicaceae | 2 | 1 | 0 | 1 | 0 | 0 |
| Cedrela fissilis Vell. | Meliaceae | 0 | 2 | 0 | 0 | 1 | 2 |
| Ceiba speciosa (A.St.-Hil.) Ravenna | Malvaceae | 0 | 1 | 0 | 0 | 0 | 0 |
| Chloroluma gonocarpa (Mart. & Eichler ex Miq.) Baill. ex Aubrév | Sapotaceae | 4 | 4 | 9 | 9 | 2 | 9 |
| Chrysophyllum marginatum (Hook. & Arn.) Radlk. | Sapotaceae | 0 | 0 | 0 | 0 | 0 | 1 |
| Cinnamomum hirsutum (Lorea-Hern.) van der Werff | Lauraceae | 0 | 1 | 0 | 0 | 0 | 0 |
| Citronella paniculata (Mart.) R.A.Howard | Cardiopteridaceae | 0 | 0 | 1 | 0 | 0 | 2 |
| Citrus sp. | Rutaceae | 0 | 0 | 0 | 1 | 1 | 0 |
| Coffea sp. | Rubiaceae | 0 | 0 | 0 | 0 | 0 | 1 |
| Cordia americana (L.) Gottschling & J.S.Mill. | Boraginaceae | 0 | 0 | 0 | 0 | 1 | 0 |
| Cordia ecalyculata Vell. | Boraginaceae | 1 | 0 | 1 | 0 | 0 | 0 |
| Cordia trichotoma (Vell.) Arráb. ex Steud. | Boraginaceae | 0 | 0 | 4 | 0 | 0 | 0 |
| Croton floribundus Spreng. | Euphorbiaceae | 0 | 5 | 1 | 0 | 0 | 4 |
| Cupania vernalis Cambess. | Sapindaceae | 0 | 0 | 1 | 0 | 0 | 0 |
| Dahlstedtia muehlbergiana (Hassl.) M.J.Silva & A.M.G.Azevedo | Fabaceae | 3 | 0 | 4 | 5 | 2 | 2 |
| Diatenopteryx sorbifolia Radlk. | Sapindaceae | 0 | 0 | 0 | 1 | 0 | 0 |
| Didymopanax morototoni (Aubl.) Decne. & Planch. | Araliaceae | 0 | 1 | 0 | 0 | 0 | 0 |
| Diospyros inconstans Jacq. | Ebenaceae | 0 | 0 | 0 | 0 | 0 | 1 |
| Endlicheria paniculata (Spreng.) J.F.Macbr. | Lauraceae | 0 | 2 | 0 | 0 | 0 | 2 |
| Esenbeckia febrifuga (A.St.-Hil.) A. Juss. ex Mart. | Rutaceae | 2 | 0 | 0 | 0 | 0 | 0 |
| Esenbeckia grandiflora Mart. | Rutaceae | 0 | 6 | 0 | 8 | 0 | 0 |
| Eugenia burkartiana (D.Legrand) D.Legrand | Myrtaceae | 0 | 0 | 0 | 0 | 0 | 1 |
| Eugenia florida DC. | Myrtaceae | 0 | 0 | 1 | 4 | 2 | 0 |
| Eugenia handroi (Mattos) Mattos | Myrtaceae | 7 | 0 | 4 | 3 | 5 | 0 |
| Eugenia hiemalis Cambess. | Myrtaceae | 0 | 0 | 0 | 1 | 0 | 0 |
| Eugenia longipedunculata Nied. | Myrtaceae | 5 | 0 | 0 | 20 | 7 | 2 |
| Eugenia neoverrucosa Sobral | Myrtaceae | 1 | 8 | 2 | 0 | 2 | 8 |
| Eugenia paracatuana O.Berg | Myrtaceae | 0 | 1 | 3 | 4 | 4 | 0 |
| Eugenia ramboi D.Legrand | Myrtaceae | 2 | 6 | 3 | 2 | 5 | 5 |
| Eugenia uniflora L. | Myrtaceae | 0 | 0 | 0 | 3 | 3 | 0 |
| Euterpe edulis Mart. | Arecaceae | 0 | 3 | 0 | 0 | 0 | 2 |
| Ficus eximia Schott | Moraceae | 0 | 0 | 0 | 0 | 2 | 1 |
| Ficus insipida Willd. | Moraceae | 0 | 1 | 0 | 0 | 0 | 0 |
| Gallesia integrifolia (Spreng.) Harms | Phytolaccaceae | 10 | 0 | 12 | 23 | 22 | 1 |
| Genipa americana L. | Rubiaceae | 0 | 0 | 1 | 0 | 0 | 0 |
| Guapira opposita (Vell.) Reitz | Nyctaginaceae | 0 | 2 | 0 | 0 | 0 | 1 |
| Guarea kunthiana A.Juss. | Meliaceae | 0 | 16 | 3 | 1 | 1 | 40 |
| Guarea macrophylla Vahl | Meliaceae | 0 | 3 | 1 | 0 | 1 | 2 |
| Guatteria australis A.St.-Hil. | Annonaceae | 0 | 2 | 0 | 0 | 0 | 0 |
| Holocalyx balansae Micheli | Fabaceae | 14 | 7 | 3 | 2 | 5 | 6 |
| Inga marginata Willd. | Fabaceae | 0 | 7 | 1 | 1 | 1 | 3 |
| Inga striata Benth. | Fabaceae | 0 | 5 | 0 | 4 | 0 | 1 |
| Jacaranda micrantha Cham. | Bignoniaceae | 0 | 0 | 1 | 0 | 0 | 0 |
| Jacaratia spinosa (Aubl.) A.DC. | Caricaceae | 0 | 5 | 1 | 0 | 0 | 0 |
| Justicia brasiliana Roth | Acanthaceae | 0 | 1 | 0 | 0 | 0 | 0 |
| Lauraceae sp. 1 | Lauraceae | 0 | 0 | 0 | 0 | 0 | 1 |
| Lauraceae sp. 2 | Lauraceae | 0 | 1 | 0 | 0 | 0 | 0 |
| Lonchocarpus cultratus (Vell.) A.M.G.Azevedo & H.C.Lima | Fabaceae | 0 | 0 | 0 | 1 | 0 | 0 |
| Machaerium aculeatum Raddi | Fabaceae | 0 | 0 | 0 | 2 | 0 | 0 |
| Machaerium paraguariense Hassl. | Fabaceae | 1 | 1 | 1 | 0 | 0 | 0 |
| Machaerium stipitatum Vogel | Fabaceae | 9 | 2 | 2 | 3 | 2 | 1 |
| Maclura tinctoria (L.) D.Don ex Steud. | Moraceae | 1 | 0 | 0 | 0 | 0 | 0 |
| Margaritaria nobilis L.f. | Phyllanthaceae | 0 | 1 | 2 | 0 | 0 | 0 |
| Metrodorea nigra A.St.-Hil. | Rutaceae | 20 | 0 | 52 | 11 | 66 | 0 |
| Miconia petropolitana Cogn. | Melastomataceae | 0 | 1 | 0 | 0 | 0 | 0 |
| Miconia pusilliflora (DC.) Naudin | Melastomataceae | 0 | 0 | 1 | 0 | 0 | 0 |
| Mollinedia clavigera Tul. | Moniminaceae | 0 | 12 | 0 |  | 0 | 8 |
| Mollinedia widgrenii A.DC | Moniminaceae | 0 | 0 | 0 | 0 | 1 | 0 |
| Monteverdia ilicifolia (Mart. ex Reissek) Biral | Celastraceae | 0 | 0 | 0 | 1 | 1 | 0 |
| Muellera campestris (Mart. ex Benth.) M.J. Silva & A.M.G. Azevedo | Fabaceae | 0 | 0 | 0 | 2 | 0 | 0 |
| Myrceugenia miersiana (Gardner) D.Legrand & Kausel | Myrtaceae | 0 | 1 | 0 | 0 | 0 | 0 |
| Myrcia loranthifolia (DC.) G.P.Burton & E.Lucas | Myrtaceae | 0 | 1 | 0 | 0 | 0 | 0 |
| Myriopus breviflorus (DC.) Luebert | Boraginaceae | 1 | 0 | 0 | 0 | 0 | 0 |
| Myrocarpus frondosus Allemão | Fabaceae | 0 | 0 | 0 | 0 | 1 | 0 |
| Myroxylon peruiferum L.f. | Fabaceae | 0 | 0 | 0 | 0 | 0 | 1 |
| Myrsine gardneriana A.DC. | Primulaceae | 0 | 2 | 0 | 0 | 0 | 0 |
| Myrsine umbellata Mart. | Primulaceae | 2 | 2 | 2 | 2 | 1 | 1 |
| Myrtaceae sp. 1 | Myrtaceae | 1 | 0 | 0 | 0 | 0 | 0 |
| Myrtaceae sp. 10 | Myrtaceae | 0 | 0 | 2 | 0 | 0 | 0 |
| Myrtaceae sp. 11 | Myrtaceae | 0 | 0 | 1 | 0 | 0 | 0 |
| Myrtaceae sp. 2 | Myrtaceae | 1 | 0 | 0 | 0 | 0 | 0 |
| Myrtaceae sp. 3 | Myrtaceae | 1 | 0 | 0 | 0 | 0 | 0 |
| Myrtaceae sp. 4 | Myrtaceae | 1 | 0 | 0 | 0 | 0 | 0 |
| Myrtaceae sp. 5 | Myrtacea | 0 | 0 | 0 | 1 | 0 | 0 |
| Myrtaceae sp. 6 | Myrtaceae | 0 | 0 | 0 | 1 | 0 | 0 |
| Myrtaceae sp. 7 | Myrtacea | 0 | 0 | 0 | 1 | 0 | 0 |
| Myrtaceae sp. 8 | Myrtacea | 0 | 0 | 0 | 1 | 0 | 0 |
| Myrtaceae sp. 9 | Myrtaceae | 0 | 0 | 2 | 0 | 0 | 0 |
| Nectandra megapotamica (Spreng.) Mez | Lauraceae | 0 | 2 | 0 | 4 | 2 | 2 |
| Neomitranthes glomerata (D.Legrand) D.Legrand | Myrtaceae | 0 | 0 | 0 | 0 | 0 | 10 |
| Ocotea diospyrifolia (Meisn.) Mez | Lauraceae | 0 | 0 | 0 | 0 | 0 | 1 |
| Ocotea indecora (Schott) Mez | Lauraceae | 1 | 1 | 0 | 0 | 0 | 2 |
| Ocotea prolifera (Nees & Mart.) Mez | Lauraceae | 7 | 1 | 2 | 4 | 8 | 12 |
| Ocotea silvestris Vattimo-Gil | Lauraceae | 0 | 3 | 1 | 0 | 0 | 0 |
| Solanum caavurana Vell. | Solanaceae | 0 | 1 | 0 | 0 | 0 | 1 |
| Pachystroma longifolium (Nees) I.M.Johnst. | Euphorbiaceae | 0 | 0 | 0 | 5 | 2 | 0 |
| Parapiptadenia rigida (Benth.) Brenan | Fabaceae | 5 | 0 | 5 | 4 | 3 | 0 |
| Pavonia sepium A.St.-Hil. | Malvaceae | 0 | 1 | 0 | 0 | 0 | 0 |
| Peltophorum dubium (Spreng.) Taub. | Fabaceae | 2 | 0 | 0 | 1 | 2 | 0 |
| Phytolacca dioica L | Phytolaccaceae | 0 | 0 | 1 | 1 | 0 | 0 |
| Picramnia ramiflora Planch. | Picramniaceae | 5 | 1 | 4 | 9 | 11 | 11 |
| Pilocarpus pennatifolius Lem. | Rutaceae | 0 | 0 | 0 | 0 | 2 | 0 |
| Piper amalago L. | Piperaceae | 2 | 1 | 6 | 5 | 2 | 0 |
| Piptadenia gonoacantha (Mart.) J.F.Macbr. | Fabaceae | 4 | 0 | 9 | 8 | 1 | 0 |
| Pisonia ambigua Heimerl | Nyctaginaceae | 0 | 1 | 2 | 0 | 1 | 2 |
| Plinia peruviana (Poir.) Govaerts | Myrtaceae | 0 | 3 | 0 | 2 | 0 | 1 |
| Plinia rivularis (Cambess.) Rotman | Myrtaceae | 0 | 1 | 0 | 1 | 0 | 1 |
| Poecilanthe parviflora Benth. | Fabaceae | 2 | 0 | 1 | 0 | 0 | 0 |
| Pombalia bigibbosa (A.St.-Hil.) Paula-Souza | Violaceae | 1 | 1 | 0 | 0 | 0 | 0 |
| Prockia crucis P.Browne ex L. | Salicaceae | 0 | 0 | 3 | 0 | 0 | 0 |
| Prunus myrtifolia (L.) Urb. | Rosaceae | 0 | 2 | 0 | 0 | 0 | 1 |
| Pterogyne nitens Tul. | Fabaceae | 0 | 0 | 0 | 3 | 0 | 0 |
| Rudgea jasminoides (Cham.) Müll.Arg. | Rubiaceae | 0 | 11 | 0 | 0 | 0 | 0 |
| Ruprechtia laxiflora Meisn. | Polygonaceae | 6 | 0 | 1 | 12 | 5 | 0 |
| Schefflera sp. | Araliaceae | 0 | 1 | 0 | 0 | 0 | 0 |
| Schoepfia brasiliensis A.DC. | Schoepfiaceae | 0 | 0 | 0 | 1 | 0 | 0 |
| Senegalia polyphylla (DC.) Britton & Rose | Fabaceae | 4 | 1 | 2 | 0 | 2 | 0 |
| Sloanea hirsuta (Schott) Planch. ex Benth. | Elaeocarpaceae | 0 | 3 | 0 | 0 | 0 | 0 |
| Solanum argenteum Dunal | Solanaceae | 0 | 1 | 0 | 0 | 0 | 2 |
| Sorocea bonplandii (Baill.) W.C.Burger et al. | Moraceae | 6 | 11 | 24 | 1 | 17 | 10 |
| Strychnos brasiliensis (Spreng.) Mart. | Loganiaceae | 0 | 0 | 0 | 0 | 1 | 1 |
| Sweetia fruticosa Spreng. | Fabaceae | 0 | 0 | 0 | 5 | 0 | 0 |
| Syagrus oleracea (Mart.) Becc. | Arecaceae | 4 | 0 | 0 | 0 | 0 | 0 |
| Syagrus romanzoffiana (Cham.) Glassman | Arecaceae | 0 | 0 | 5 | 0 | 0 | 1 |
| sychotria suterella Müll.Arg. | Rubiaceae | 0 | 5 | 0 | 0 | 0 | 0 |
| Terminalia glabrescens Mart. | Combretaceae | 0 | 0 | 0 | 1 | 0 | 0 |
| Tetrorchidium rubrivenium Poepp. | Euphorbiaceae | 0 | 4 | 0 | 0 | 0 | 0 |
| Trichilia casaretti C.DC. | Meliaceae | 1 | 0 | 1 | 1 | 1 | 10 |
| Trichilia catigua A.Juss. | Meliaceae | 7 | 2 | 6 | 1 | 12 | 11 |
| Trichilia clausseni C.DC. | Meliaceae | 0 | 24 | 0 | 0 | 0 | 28 |
| Trichilia elegans A.Juss. | Meliaceae | 7 | 3 | 1 | 4 | 1 | 5 |
| Trichilia pallens C.DC. | Meliaceae | 0 | 5 | 0 | 0 | 1 | 3 |
| Trichilia pallida Sw. | Meliaceae | 6 | 1 | 12 | 5 | 5 | 2 |
| Zanthoxylum caribaeum Lam. | Rutaceae | 0 | 0 | 0 | 0 | 1 | 0 |
| Zanthoxylum rhoifolium Lam. | Rutaceae | 0 | 0 | 0 | 1 | 1 | 0 |
| Zeyheria tuberculosa (Vell.) Bureau ex Verl. | Bignoniaceae | 0 | 0 | 1 | 0 | 0 | 0 |

**Table S2-** Species sampled in five reforestation areas of semi-deciduous seasonal forest in the northern region of the state of Paraná.ALV = Alvorada farm; CGH = Congonhas farm; FZE = Fazenda Escola; PMG = Mata dos Godoy State Park; SAN = Santo Antônio farm.

| **Species name** | **Family** | **ALV** | **CGH** | **FZE** | **PMG** | **SAN** |
| --- | --- | --- | --- | --- | --- | --- |
| Aegiphila integrifolia (Jacq.) Moldenke | Lamiaceae | 0 | 3 | 0 | 1 | 1 |
| Albizia niopoides (Spruce ex Benth.) Burkart | Fabaceae | 1 | 4 | 0 | 3 | 25 |
| Alchornea glandulosa Poepp. & Endl. | Euphorbiaceae | 1 | 12 | 16 | 15 | 17 |
| Alchornea sp. | Euphorbiaceae | 0 | 0 | 2 | 0 | 0 |
| Alchornea triplinervia (Spreng.) Müll.Arg. | Euphorbiaceae | 0 | 1 | 3 | 1 | 0 |
| Allophylus edulis (A.St.-Hil. et al.) Hieron. ex Niederl. | Sapindaceae | 1 | 0 | 48 | 0 | 0 |
| Aloysia virgata (Ruiz & Pav.) Juss. | Verbenaceae | 0 | 0 | 0 | 1 | 0 |
| Anadenanthera colubrina (Vell.) Brenan | Fabaceae | 0 | 1 | 0 | 6 | 4 |
| Annona cacans Warm. | Annonaceae | 0 | 0 | 0 | 0 | 1 |
| Annona sylvatica A.St.-Hil. | Annonaceae | 2 | 0 | 0 | 0 | 2 |
| Araucaria angustifolia (Bertol.) Kuntze | Araucariaceae | 0 | 0 | 4 | 0 | 0 |
| Astronium graveolens Jacq. | Anacardiaceae | 0 | 8 | 0 | 0 | 2 |
| Bastardiopsis densiflora (Hook. & Arn.) Hassl. | Malvaceae | 6 | 12 | 1 | 7 | 0 |
| Bauhinia forficata Link | Fabaceae | 15 | 1 | 2 | 2 | 3 |
| Bougainvillea spectabilis Willd. | Nyctaginaceae | 1 | 1 | 10 | 0 | 1 |
| Cabralea canjerana (Vell.) Mart. | Meliaceae | 0 | 0 | 57 | 22 | 1 |
| Casearia gossypiosperma Briq. | Salicaceae | 3 | 0 | 0 | 1 | 0 |
| Casearia sylvestris Sw. | Salicaceae | 0 | 1 | 4 | 0 | 0 |
| Cecropia pachystachya Trécul | Urticaceae | 5 | 3 | 0 | 0 | 33 |
| Cedrela fissilis Vell. | Meliaceae | 0 | 0 | 0 | 0 | 1 |
| Ceiba speciosa (A.St.-Hil.) Ravenna | Malvaceae | 0 | 1 | 0 | 0 | 1 |
| Cestrum intermedium Sendtn. | Solanaceae | 0 | 7 | 1 | 0 | 0 |
| Chloroluma gonocarpa (Mart. & Eichler ex Miq.) Baill. ex Aubrév | Sapotaceae | 1 | 0 | 6 | 0 | 0 |
| Citharexylum myrianthum Cham. | Verbenaceae | 11 | 6 | 0 | 0 | 4 |
| Colubrina glandulosa Perkins | Rhamnaceae | 0 | 7 | 5 | 3 | 0 |
| Cordia ecalyculata Vell. | Cordiaceae | 0 | 0 | 2 | 0 | 0 |
| Cordia trichotoma (Vell.) Arráb. ex Steud. | Cordiaceae | 17 | 3 | 5 | 0 | 8 |
| Croton floribundus Spreng. | Euphorbiaceae | 0 | 13 | 14 | 2 | 14 |
| Croton urucurana Baill. | Euphorbiaceae | 3 | 0 | 0 | 2 | 0 |
| Cupania vernalis Cambess. | Sapindaceae | 0 | 2 | 0 | 0 | 0 |
| Dahlstedtia muehlbergiana (Hassl.) M.J.Silva & A.M.G.Azevedo | Fabaceae | 6 | 0 | 0 | 0 | 8 |
| Dalbergia frutescens (Vell.) Britton | Fabaceae | 0 | 0 | 0 | 1 | 0 |
| Endlicheria paniculata (Spreng.) J.F.Macbr. | Lauraceae | 0 | 0 | 4 | 0 | 0 |
| Enterolobium contortisiliquum (Vell.) Morong | Fabaceae | 3 | 4 | 1 | 0 | 6 |
| Eugenia florida DC. | Myrtaceae | 0 | 0 | 1 | 0 | 2 |
| Eugenia pyriformis Cambess. | Myrtaceae | 1 | 0 | 0 | 0 | 0 |
| Euterpe edulis Mart. | Arecaceae | 0 | 0 | 0 | 1 | 0 |
| Fabaceae sp. | Fabaceae | 0 | 0 | 0 | 1 | 0 |
| Ficus eximia Schott | Moraceae | 4 | 0 | 0 | 0 | 0 |
| Ficus insipida Willd. | Moraceae | 2 | 0 | 0 | 0 | 0 |
| Gallesia integrifolia (Spreng.) Harms | Phytolaccaceae | 3 | 7 | 0 | 0 | 14 |
| Genipa americana L. | Rubiaceae | 1 | 0 | 0 | 0 | 0 |
| Guarea guidonia (L.) Sleumer | Meliaceae | 0 | 0 | 0 | 0 | 1 |
| Guarea kunthiana A.Juss. | Meliaceae | 0 | 22 | 1 | 14 | 8 |
| Guazuma ulmifolia Lam. | Malvaceae | 22 | 13 | 19 | 1 | 13 |
| Handroanthus heptaphyllus (Vell.) Mattos | Bignoniaceae | 0 | 0 | 0 | 1 | 0 |
| Heliocarpus americanus L. | Malvaceae | 0 | 0 | 0 | 1 | 0 |
| Heliocarpus popayanensis Kunth | Malvaceae | 0 | 41 | 0 | 0 | 0 |
| Holocalyx balansae Micheli | Fabaceae | 0 | 0 | 1 | 0 | 0 |
| Inga spp. | Fabaceae | 3 | 0 | 0 | 0 | 12 |
| Inga laurina (Sw.) Willd. | Fabaceae | 0 | 0 | 1 | 0 | 0 |
| Inga marginata Willd. | Fabaceae | 0 | 0 | 4 | 0 | 3 |
| Inga striata Benth. | Fabaceae | 1 | 2 | 0 | 0 | 0 |
| Jacaranda micrantha Cham. | Bignoniaceae | 0 | 0 | 1 | 0 | 0 |
| Khaya grandifoliola C.DC. | Meliaceae | 0 | 0 | 2 | 0 | 0 |
| Lithraea molleoides (Vell.) Engl. | Anacardiaceae | 0 | 2 | 3 | 0 | 0 |
| Luehea divaricata Mart. | Malvaceae | 0 | 0 | 1 | 0 | 0 |
| Machaerium stipitatum Vogel | Fabaceae | 0 | 0 | 1 | 0 | 0 |
| Maclura tinctoria (L.) D.Don ex Steud. | Moraceae | 6 | 1 | 0 | 0 | 5 |
| Magnolia champaca (L.) Baill. ex Pierre | Magnoliaceae | 1 | 0 | 0 | 0 | 0 |
| Margaritaria nobilis L.f. | Phyllanthaceae | 0 | 3 | 0 | 0 | 0 |
| Miconia discolor DC. | Melastomataceae | 0 | 0 | 0 | 1 | 0 |
| Mollinedia clavigera Tul. | Monimiaceae | 0 | 0 | 1 | 0 | 0 |
| Myrsine umbellata Mart. | Primulaceae | 0 | 0 | 1 | 23 | 0 |
| Nectandra megapotamica (Spreng.) Mez | Lauraceae | 2 | 1 | 12 | 4 | 3 |
| Ocotea indecora (Schott) Mez | Lauraceae | 0 | 0 | 1 | 0 | 0 |
| Ocotea prolifera (Nees & Mart.) Mez | Lauraceae | 0 | 2 | 0 | 0 | 1 |
| Ocotea puberula (Rich.) Nees | Lauraceae | 2 | 0 | 7 | 11 | 0 |
| Ocotea silvestris Vattimo-Gil | Lauraceae | 0 | 0 | 1 | 0 | 0 |
| Parapiptadenia rigida (Benth.) Brenan | Fabaceae | 18 | 5 | 22 | 38 | 0 |
| Peltophorum dubium (Spreng.) Taub. | Fabaceae | 2 | 6 | 0 | 2 | 8 |
| Phytolacca dioica L. | Phytolaccaceae | 0 | 4 | 0 | 0 | 0 |
| Piper aduncum L. | Piperaceae | 0 | 0 | 4 | 0 | 0 |
| Piper amalago L. | Piperaceae | 3 | 0 | 29 | 2 | 3 |
| Piptadenia gonoacantha (Mart.) J.F.Macbr. | Fabaceae | 0 | 7 | 0 | 0 | 3 |
| Prunus myrtifolia (L.) Urb. | Rosaceae | 0 | 1 | 15 | 3 | 0 |
| Pseudobombax grandiflorum (Cav.) A.Robyns | Malvaceae | 0 | 0 | 2 | 0 | 0 |
| Psidium guajava L. | Myrtaceae | 1 | 0 | 0 | 0 | 0 |
| Psychotria carthagenensis Jacq. | Rubiaceae | 0 | 0 | 0 | 0 | 1 |
| Pterogyne nitens Tul. | Fabaceae | 1 | 3 | 0 | 0 | 2 |
| Rhamnidium elaeocarpum Reissek | Rhamnaceae | 1 | 0 | 0 | 0 | 2 |
| Schinus terebinthifolia Raddi | Anacardiaceae | 31 | 32 | 0 | 29 | 18 |
| Senegalia polyphylla (DC.) Britton & Rose | Fabaceae | 1 | 2 | 0 | 0 | 0 |
| Solanum pseudoquina A.St.-Hil. | Solanaceae | 1 | 0 | 1 | 0 | 12 |
| Syagrus romanzoffiana (Cham.) Glassman | Arecaceae | 8 | 0 | 0 | 1 | 0 |
| Tabernaemontana catharinensis A.DC. | Apocynaceae | 8 | 14 | 2 | 1 | 22 |
| Tecoma stans (L.) Juss. ex Kunth | Bignoniaceae | 0 | 0 | 0 | 1 | 0 |
| Trema micranthum (L.) Blume | Cannabaceae | 3 | 3 | 0 | 1 | 3 |
| Trichilia casaretti C.DC. | Meliaceae | 0 | 1 | 0 | 0 | 0 |
| Trichilia elegans A.Juss. | Meliaceae | 0 | 0 | 10 | 0 | 0 |
| Trichilia pallida Sw. | Meliaceae | 15 | 28 | 2 | 18 | 5 |
| Zanthoxylum acuminatum (Sw.) Sw. | Rutaceae | 2 | 0 | 0 | 0 | 0 |
| Zeyheria tuberculosa (Vell.) Bureau ex Verl. | Bignoniaceae | 0 | 2 | 0 | 0 | 0 |
